# Supplementary material for: miR-218-5p/RUNX2 Axis Positively Regulates Proliferation and Is Associated with Poor Prognosis in Cervical Cancer
Source: MDPI journal article supplement (doi:10.3390/ijms23136993), 2022-06-23
Supplement: s1 [file s1]

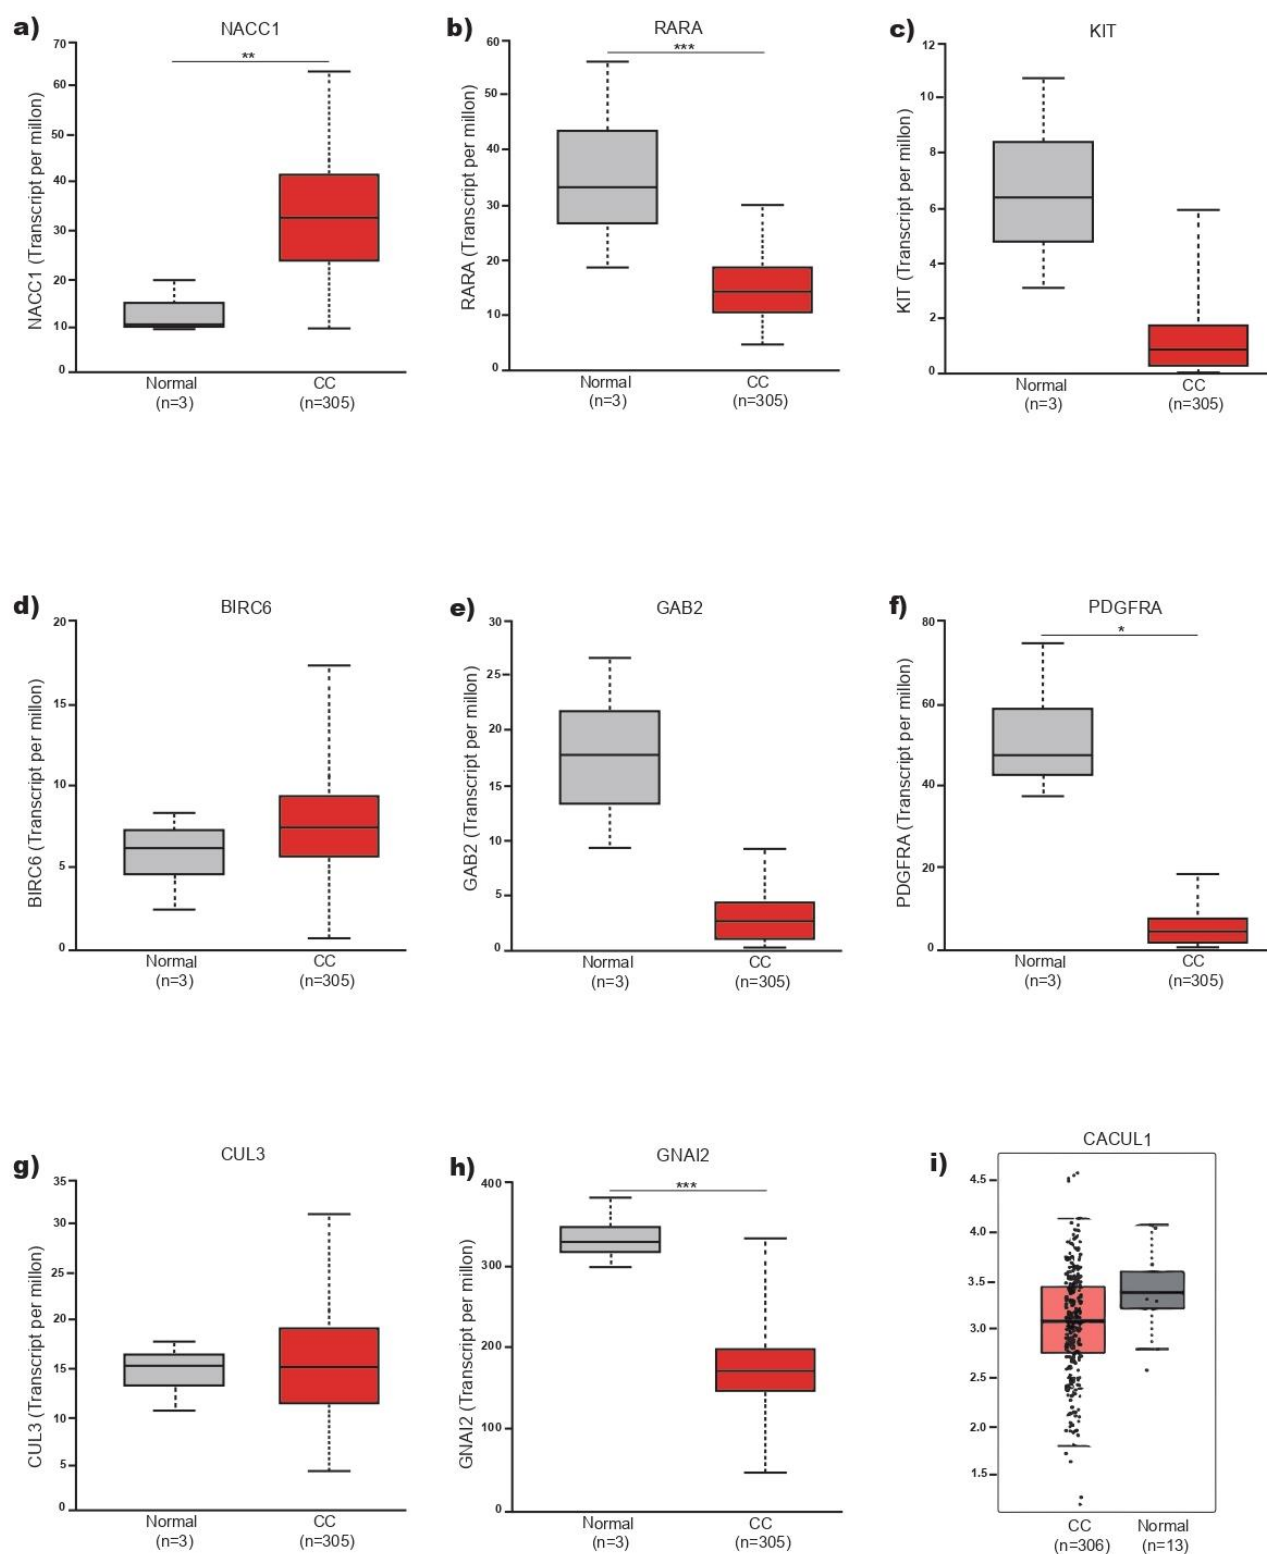

**Supplementary Figure S1.** Expression of miR-218-5p target genes. **(a-h)** Expression of target genes of miR-218-5p involved in the regulation of cellular proliferation in CC tissue. **(a)** NACC1, **(b)** RARA, **(c)** KIT, **(d)** BIRC6, **(e)** GAB2, **(f)** PDGFRA, **(g)** CUL3, **(h)** GNAI2 (data from UALCAN database). **(i)** CACUL1 (data from GEPIA). \*  $p < 0.05$ , \*\*  $p < 0.01$ , \*\*\*  $p < 0.001$ .
